## Genetic Control of Radical Crosslinking in a Semi-Synthetic Hydrogel

Austin J. Graham<sup>1,2</sup>, Christopher M. Dundas<sup>1,2</sup>, Alexander Hillsley<sup>1</sup>, Dain S. Kasprak<sup>3</sup>, Adrienne M. Rosales<sup>1,2</sup>, Benjamin K. Keitz<sup>1,2</sup>

<sup>1</sup> McKetta Department of Chemical Engineering, University of Texas at Austin, Austin, TX 78712, USA

<sup>2</sup> Center for Dynamics and Control of Materials, University of Texas at Austin, Austin, TX 78712, USA

<sup>3</sup> Department of Biomedical Engineering, University of Texas at Austin, Austin, TX 78712, USA

1

### 2 **Abstract:**

3       Enhancing materials with the qualities of living systems, including sensing, computation,  
4 and adaptation, is an important challenge in designing next-generation technologies. Living  
5 materials seek to address this challenge by incorporating live cells as actuating components that  
6 control material function. For abiotic materials, this requires new methods that couple genetic and  
7 metabolic processes to material properties. Toward this goal, we demonstrate that extracellular  
8 electron transfer (EET) from *Shewanella oneidensis* can be leveraged to control radical  
9 crosslinking of a methacrylate-functionalized hyaluronic acid hydrogel. Crosslinking rates and  
10 hydrogel mechanics, specifically storage modulus, were dependent on a variety of chemical and  
11 biological factors, including *S. oneidensis* genotype. Bacteria remained viable and metabolically  
12 active in the crosslinked network for a least one week, while cell tracking revealed that EET genes  
13 also encode control over hydrogel microstructure. Moreover, construction of an inducible gene  
14 circuit allowed transcriptional control of storage modulus and crosslinking rate via the tailored  
15 expression of a key electron transfer protein, MtrC. Finally, we quantitatively modeled  
16 dependence of hydrogel stiffness on steady-state gene expression, and generalized this result by  
17 demonstrating the strong relationship between relative gene expression and material properties.  
18 This general mechanism for radical crosslinking provides a foundation for programming the form  
19 and function of synthetic materials through genetic control over extracellular electron transfer.

### 20 **Significance Statement:**

21       Next-generation materials will require coupling the advantages of engineered and natural  
22 systems to solve complex challenges in energy, health, and the environment. Living cells, such  
23 as bacteria, naturally possess many of the qualities essential to addressing these challenges,  
24 including sensing, computation, and actuation, using their genetic and metabolic machinery. In  
25 addition, bacteria are attractive for incorporation into materials due to their durability, ease-of-use,  
26 and programmability. Here, we develop a platform for controlling hydrogel properties (e.g.,  
27 stiffness, crosslinking rate) using extracellular electron transfer from the bacterium *Shewanella*  
28 *oneidensis*. In our system, metabolic electron flux from *S. oneidensis* to a metal catalyst generates  
29 radical species that crosslink an acrylate-based macromer to form the gel. This synthetic reaction

30 is under direct control of bacterial genetics and metabolism, which we demonstrate through  
31 inducible circuits and quantitative modeling of gene expression and resultant hydrogel properties.  
32 Developing methods that capitalize on the programmability of biological systems to control  
33 synthetic material properties will enable hybrid material designs with unprecedented functions.

#### 34 **Introduction:**

35 Nature uses hierarchical and genetically-encoded instructions to construct functional  
36 materials with specific self-assembly, regulatory, healing, and morphological properties(1).  
37 Inspired by such processes, engineered living materials (ELMs) employ the autonomy of living  
38 cells to synthesize and control material structures across multiple scales with user-designed  
39 functions that are directly coupled to gene expression(2-5). Living materials containing microbes,  
40 including biofilms, bacterial cellulose, curli fibers, and synthetic gels loaded with bacteria, are of  
41 prominent interest due to their potential application in tissue engineering, 3D printing, soft  
42 robotics, metabolic engineering, and living sensors(6-10). Bacteria are particularly attractive as  
43 ELM components due to their natural sensing capabilities and programmability. For example,  
44 engineered bacteria can act as cellular actuators integrated within the ELM, tailoring its synthesis  
45 and function through overexpression, mutagenesis, and gene circuitry.

46 Not surprisingly, the majority of ELMs rely on materials natively produced by the host  
47 organism. For example, several amyloid-based materials have been synthesized by genetically  
48 tractable bacteria, such as aggregates of CsgA in *Escherichia coli*(11, 12) and TasA in *Bacillus*  
49 *subtilis*(13). Genetic fusions have allowed these fibrous matrices to bind specific molecules,  
50 conduct electricity, perform catalytic reactions, and adhere to complex surfaces(14-17). Apart  
51 from amyloids, extracellular polymerization of bacterial cellulose has been engineered using  
52 quorum sensing circuits and mutagenesis to create sturdy materials for tissue engineering and  
53 sensing applications(18, 19). Despite these advances, significant drawbacks of natural materials  
54 include their limited chemical functionality, robustness, homogeneity, and scalability compared to  
55 engineered synthetic materials(20). For example, manufactured soft materials such as polymers  
56 and hydrogels are easily-functionalized and versatile, facilitating their adoption in diverse  
57 environments. However, synthetic materials largely lack the dynamic adaptability and  
58 environmental responsiveness found in natural systems. Introducing these qualities to synthetic  
59 materials could synergistically enhance ELMs and enable new applications that combine the  
60 precision and chemical diversity of engineered materials with the autonomy and evolvability of  
61 living cells. However, such designs will require methods for bacteria to control synthetic material  
62 properties at the genotypic level. Similarly, robust transcriptional control and quantitative

63 prediction of the relationship between gene expression and material properties are needed for  
64 ELMs to approach the design precision of engineered materials.

65         Toward this goal, we recently developed a cell-controlled radical polymerization reaction  
66 using extracellular electron transfer (EET) from the organism *Shewanella oneidensis*(21). In this  
67 process, electron flux from native carbon metabolism was redirected to a metal catalyst which  
68 controlled a polymerization governed by the atom-transfer radical polymerization (ATRP)  
69 mechanism. Importantly, we demonstrated that control over polymer production was directly  
70 coupled to cell metabolism and genetically encoded through specific EET proteins. Since ATRP  
71 is a versatile platform for soft material synthesis(22), we hypothesized that EET-powered catalysis  
72 could be extended to control radical crosslinking in a synthetic hydrogel. While there are  
73 numerous examples of incorporating live cells into polymer networks, network properties such as  
74 crosslink density, mesh size, degradation, and elastic modulus have generally been designed  
75 independent of cell activity. In addition, previous attempts to incorporate cells as live crosslinking  
76 agents in synthetic hydrogels have relied on the activity of glucose peroxidase or extracellular  
77 functionalization of cells after growth(23-27), which compromise cell viability through the creation  
78 of toxic reactive oxygen species or are not under cellular control. Cell-free gelation systems using  
79 bacterial lysates have also been explored(28), but removing the living component prevents  
80 continued responsiveness. We envisioned that controlling radical crosslinking via EET gene  
81 expression would capitalize on the programmability of bacteria and enable the use of stimuli-  
82 responsive synthetic biology circuits to control material function.

83         Here, we demonstrate that EET from *S. oneidensis* can be used to control radical  
84 crosslinking of a semi-synthetic methacrylated hyaluronic acid (MeHA) hydrogel (Fig. 1a). First,  
85 we show that EET is required for gelation, and that organisms without this metabolic capability  
86 (i.e., *E. coli*) are unable to crosslink gels on a comparable time scale or in a controllable manner.  
87 Gels did not form unless a constant source of electron flux, radical initiator, and metal catalyst  
88 were present. Additionally, the facultative metabolic capability of *S. oneidensis* enabled  
89 crosslinking under benchtop conditions without dedicated oxygen removal. Analysis of cell motility  
90 and metabolic activity revealed that bacteria remain viable and responsive in the gels for a  
91 minimum of one week, and that degree of crosslinking by EET affected cell movement. Next, we  
92 found that crosslink density was a strong function of bacterial genetics, as cytochrome knockout  
93 strains synthesized gels more slowly and with decreasing stiffness correspondent to the number  
94 of removed EET genes. Finally, transcriptional circuits based on controlling the expression of  
95 *mtrC* with the LacI repressor enabled tunable crosslinking rates and hydrogel mechanical  
96 properties. We found that hydrogel storage modulus fit well to inducible gene expression models,

97 directly linking steady-state gene expression to a quantifiable and macroscopic material property.  
98 Overall, our results suggest that transcriptional control over EET can be used to predictably  
99 interface the properties of living systems with potentially any material amenable to radical  
100 crosslinking.

## 101 **Results:**

### 102 **Extracellular Electron Transfer from Live *S. oneidensis* Controls Aerobic Radical** 103 **Crosslinking**

104 To initially validate our hypothesis that EET-controlled ATRP could be used to form a  
105 crosslinked hydrogel, we first synthesized a 65% methacrylated hyaluronic acid (MeHA)  
106 macromer using an established protocol(29) (Fig. S1). Hyaluronic acid is a common naturally-  
107 derived biomaterial platform that is attractive for our application due to its biocompatibility and  
108 chemical versatility(30). The high density of functional groups was chosen to increase likelihood  
109 of successful crosslinking and to minimize the effect of radical scavenging by oxygen. In initial  
110 experiments, MeHA was dissolved at 3 wt.% in *Shewanella* Basal Medium (SBM) supplemented  
111 with casamino acids (Table S2,3), and the dissolved macromer was mixed with a radical initiator,  
112 2-hydroxyethyl 2-bromoisobutyrate (HEBIB, 500  $\mu$ M), a copper catalyst with Tris(2-  
113 pyridylmethyl)amine ligand (Cu-TPMA, 10  $\mu$ M), and inoculated with anaerobically pregrown *S.*  
114 *oneidensis* MR-1 cells ( $OD_{600} = 0.2$ ). Lactate (20 mM) was the electron donor and fumarate (40  
115 mM) was the primary electron acceptor. After mixing, the solution was placed in a humidified  
116 anaerobic chamber and was monitored via inversion testing. After 2 h, solutions containing *S.*  
117 *oneidensis* crosslinked to form polymer networks, whereas solutions containing *E. coli* did not  
118 (Fig. 1b). Consistent with our previous results(21), these data suggest that electron flux to the  
119 metal catalyst from EET-based metabolism is required for radical generation and crosslinking.

120 Taking advantage of its facultative metabolism, we next tested radical crosslinking of  
121 hydrogels by *S. oneidensis* under ambient as opposed to anaerobic conditions. Using the same  
122 reagent concentrations as above with aerobically pregrown cells (henceforth, standard  
123 conditions), *S. oneidensis* formed crosslinked networks at 30 °C in microcentrifuge tubes without  
124 dedicated oxygen removal, as confirmed via inversion test. After these preliminary  
125 demonstrations, we more thoroughly investigated the mechanical properties of the gels using  
126 shear oscillatory rheology. 50  $\mu$ L solutions were inoculated and placed between two  
127 hydrophobically-treated glass slides with a 0.5 mm silicone spacer, allowed to crosslink, and  
128 swollen overnight at room temperature in 1x PBS. Storage and loss moduli were determined from  
129 the linear viscoelastic regime as determined by strain and frequency sweeps (Fig. S2), and  
130 calculated using a 0.01 to 100 Hz frequency sweep at 0.1% strain. Gels formed in both aerobic

131 and anaerobic environments yielded comparable mechanical properties and were predominantly  
132 elastic networks (Fig. S3). Gels prepared by *S. oneidensis* were also mechanically similar to  
133 acellular gels crosslinked using UV light and the photoinitiator lithium phenyl-2,4,6-  
134 trimethylbenzoylphosphinate (LAP, 500  $\mu\text{M}$ ) (Fig. S4). In addition, controls lacking (a) EET-active  
135 bacteria, (b) radical initiator, (c) metal catalyst, or (d) methacrylate functional group did not form  
136 measurable gels within 2 h (Fig. 2a, Fig. S5). Together, these results demonstrate that EET-  
137 crosslinked hydrogels can be synthesized under ambient or anaerobic conditions using  
138 electroactive bacteria to form mechanically robust networks that are typical of this macromer.

139 The crosslinking kinetics and mechanical properties of polymer networks strongly depend  
140 on a variety of chemical factors such as catalyst and ligand identity, rate of initiation, and initiator  
141 structure(31). Thus, we next explored the tunable range of hydrogel stiffness after 2 h of  
142 crosslinking by altering the concentration and identity of the chemical components in our system  
143 (Fig. S6). First, we varied the concentration of the metal catalyst from 5  $\mu\text{M}$  to 20  $\mu\text{M}$ . Greater  
144 catalyst concentrations were not considered due to copper-induced transcriptional responses in  
145 *Shewanella* at concentrations greater than 20  $\mu\text{M}$ (32). Increasing catalyst concentration  
146 correspondingly increased gel modulus (Fig. 2b). Second, we varied the concentration of the  
147 initiator over the range of 250 to 1000  $\mu\text{M}$ . As expected, increasing gel stiffness was a function of  
148 increasing initiator concentration (Fig. 2c). An additional advantage of ATRP over hydroxyl  
149 radicals is the potential for using structurally well-defined radical initiators. Consistent with this  
150 expectation, we found that a PEG-based initiator, poly(ethylene glycol) bis(2-bromoisobutyrate)  
151 ( $M_{n,avg} = 700$  g/mol), also successfully crosslinked EET-controlled gels at a variety of  
152 concentrations (Fig. S7). Overall, EET-controlled hydrogels exhibited a modulus range of about  
153 1-6 kPa for the conditions tested, which is typical of chain-growth crosslinked MeHA hydrogels  
154 and within range for a variety of applications, such as biofilm and tissue mimetics(29, 33, 34).  
155 These results also indicate that traditional approaches to tuning hydrogel mechanics are still  
156 applicable when using EET-controlled crosslinking.

157 Next, we investigated the role of inoculating *S. oneidensis* cell density, and thus aggregate  
158 EET flux, on hydrogel modulus. Below a certain critical inoculum (around  $\text{OD}_{600} = 0.1$ ), the rate of  
159 bacterial oxygen consumption was not fast enough to overcome oxygen diffusion and radical  
160 quenching. As expected, hydrogels formed with sufficient cell density, and stiffness strongly  
161 correlated with  $\text{OD}_{600}$  (Fig. 2d). Based on these results, we predicted that crosslinking rate would  
162 also be coupled to EET and initial cell density. To confirm this, we performed rheological  
163 measurements *in situ*, which provided real-time measurement of mechanical properties during  
164 crosslinking, at 1 Hz and 0.1% strain. Gels formed at higher initial cell concentrations were not

165 only stronger, but formed more quickly (Fig. 2e). Consistent with end-point experiments, *in situ*  
166 rheology measurements also confirmed that a critical concentration of cells was necessary for  
167 oxygen depletion. Together, these results demonstrate that cells play a direct role in crosslinking,  
168 and overall stiffness and crosslinking rate can be controlled by cell inoculum. They also suggest  
169 that genetic and metabolic manipulations to tune EET flux could be used to influence gel  
170 mechanics.

### 171 ***S. oneidensis* Remain Viable and Metabolically Active in the Polymer Network**

172 For a living material to maintain responsiveness, it is critical that the actuating components  
173 (i.e., cells) remain viable and encased in the network. The various components of our system,  
174 including the Cu catalyst, initiator, and presence of radicals could affect cell viability. Thus, we  
175 assessed cell viability and activity after crosslinking. EET-crosslinked gels formed in standard  
176 conditions were swollen overnight in 1x PBS after modulus measurements, and stained using  
177 BacLight Live/Dead dyes. Even after mechanical stresses induced by swelling and rheometer  
178 measurements, cells maintained approximately 100% viability 5 days after crosslinking (Fig. S9).  
179 In addition, cells exposed to crosslinking conditions, but released from the gel surface during  
180 swelling, could successfully inoculate new cultures in fresh growth media, indicating viability;  
181 these cultures were also able to crosslink new hydrogels with identical properties (Fig. S10).

182 Since new cultures could be inoculated using cells released during swelling, we next  
183 quantified escape or leakage of bacteria from the gels after crosslinking. At the functional group  
184 density and crosslink molecular weight of our material, the mesh size of a fully converted gel  
185 should be on the order of 10-50 nm(35, 36). Because this is considerably smaller than average  
186 bacterial dimensions, there should be minimal cell escape. To test this prediction, crosslinked  
187 gels were prepared at standard conditions, swollen in 1 mL of 1x PBS, and the optical density of  
188 the surrounding media was measured. An initial, low optical density of cells was detected  
189 immediately upon swelling. We hypothesized that this was due to an instantaneous egress of  
190 cells on the periphery of the gels and not contained in the network. After washing gels 3x with 1  
191 mL PBS to remove this outer layer of cells, no increase in optical density was detected.  
192 Furthermore, colony counting confirmed that escaped cells after 24 h of swelling accounted for <  
193 0.005% of the inoculating density (Fig. S11), suggesting embedded cells do not escape the  
194 network in significant numbers.

195 Continued network adaptation and design of new functions requires an understanding of  
196 spatiotemporal cell behavior within the gels during synthesis. Therefore, we next visualized the  
197 relationship between genotype, crosslink density, and cell movement during gelation. We  
198 constructed an inducible *sfGFP* expression plasmid under the control of the LacI repressor protein



199 and its cognate promoter,  $P_{tac}$ . Cells were transformed with this vector such that sensing of  
200 isopropyl  $\beta$ -D-1-thiogalactopyranoside (IPTG) would induce a fluorescent response indicative of  
201 metabolic activity. We developed two reporter strains by transforming both *S. oneidensis* MR-1  
202 and  $\Delta mtrC\Delta omcA\Delta mtrF$  (an EET-deficient knockout, described below) with this construct. Strains  
203 were grown overnight in 1000  $\mu$ M IPTG, washed, and inoculated into standard gelation mixtures.  
204 The solution was then pipetted onto a glass slide and sealed under a coverslip, such that  
205 crosslinking occurred in the sealed layer. Bacterial movement was monitored by time-lapse  
206 imaging using GFP fluorescence. Cells were uniformly dispersed within the network throughout  
207 gelation. For both *S. oneidensis* MR-1 and  $\Delta mtrC\Delta omcA\Delta mtrF$ , a significant degree of bacterial  
208 motion was visible upon inoculation, both by convective flow of the reaction mixture and by  
209 flagella-based swimming(37). Minutes after inoculation, cell movement and bulk fluid motion was  
210 arrested in the *S. oneidensis* MR-1 sample as crosslinking proceeded (Movie S1). Contrastingly,  
211 movement both from flow and swimming were still perceptible after 2 h in the  $\Delta mtrC\Delta omcA\Delta mtrF$   
212 sample, indicating that minimal crosslinking occurred (Movie S2). Cell movement was quantified  
213 using TrackMate in Fiji 1.0(38), which revealed that average cell displacement over 5 seconds  
214 was significantly greater for the knockout strain at both 0 and 2 h (Fig. 3a, Fig. S12). Movement  
215 was not significantly different between the two strains in non-functionalized hyaluronic acid  
216 solution, suggesting the observed motility differences were due to crosslinking, even at early times  
217 immediately following inoculation (Fig. S13, Movies S3-4). These results confirm that cells  
218 become trapped in the polymer network as it forms, and suggest that bacterial genotype encodes  
219 control over bulk and microscopic properties such as crosslink density and mesh size, affecting  
220 flow, diffusion, and cell movement within the material.

221 Although the cells remained viable for days in the crosslinked gels, we wished to assess  
222 their continued sensing and metabolic capabilities over long periods after crosslinking. Gels  
223 synthesized at standard conditions with sfGFP-expressing *S. oneidensis* MR-1 were swollen in  
224 1x PBS for varying lengths of time after crosslinking, then induced for 24 h with 1000  $\mu$ M IPTG.  
225 Significant fluorescence was detected by microscopy in induced samples up to 1 week after  
226 crosslinking (Fig. S14), but was not detectable in uninduced samples. Together, these results  
227 indicate that the bacteria remain viable, trapped, and maintain transcriptional and translational  
228 capabilities for extended periods after crosslinking.

### 229 **Bacterial Genetics Govern Crosslink Density**

230 Understanding the genetic link between EET and crosslinking is critical for biologically  
231 controlling hydrogel structure and function. Toward this goal, we employed various EET knockout  
232 strains in crosslinking reactions. The Mtr pathway is a primary source of EET flux in anaerobic *S.*

233 *oneidensis* metabolism (Fig. 1a). Outer membrane cytochromes MtrC and OmcA are terminal  
234 reductases of the Mtr pathway, and responsible for direct transfer of electrons onto metal species  
235 such as Fe and Cu(21, 39). MtrF is a homologue to MtrC and can similarly reduce a variety of  
236 metals(40). We employed three different cytochrome knockout strains in assessing the role of  
237 EET in crosslinking:  $\Delta mtrC\Delta omcA$ ,  $\Delta mtrC\Delta omcA\Delta mtrF$ , and  $\Delta Mtr$ . The knockout  $\Delta Mtr$  refers to a  
238 strain with a large number of EET genes knocked out that should provide minimal electron flux to  
239 the catalyst (Table S1)(39, 41). *E. coli* MG1655 was also included as an EET-deficient control.  
240 We measured *in situ* crosslinking kinetics using these strains, and compared crosslinking rates  
241 and density. Both crosslinking rate and hydrogel storage modulus strongly corresponded with  
242 bacterial genotype, where decreasing number of EET genes led to decreased crosslinking rates  
243 and weaker moduli (Fig. 3b). Although MtrC is the primary terminal reductase for many metal  
244 substrates, our results show that MtrF exhibits compensatory reduction of Cu in the  $\Delta mtrC\Delta omcA$   
245 knockout compared to the  $\Delta mtrC\Delta omcA\Delta mtrF$  knockout. The strong similarity between gels  
246 formed by the  $\Delta mtrC\Delta omcA\Delta mtrF$  and  $\Delta Mtr$  knockouts further demonstrates that outer membrane  
247 cytochromes are primarily responsible for electron transfer to the Cu catalyst and subsequent  
248 crosslinking activity. The minimal, delayed crosslinking activity of *E. coli* suggests that background  
249 radical generation or non-specific Cu reduction can produce weak gels at extended times. In  
250 separate experiments, we corroborated these *in situ* results using end-point, swollen gel  
251 measurements after 1 and 2 h of crosslinking (Fig. 3c, Fig. S15). *S. oneidensis* MR-1 and  
252  $\Delta mtrC\Delta omcA$  formed gels the fastest and were measurable at 1 h, whereas the other strains did  
253 not form measurable gels by this time. Measurable networks were formed by  $\Delta mtrC\Delta omcA\Delta mtrF$   
254 and  $\Delta Mtr$  at 2 h, but were significantly weaker than gels formed by the strains containing more  
255 EET machinery. Overall, these results show that bacterial genotype directly governs gel modulus  
256 and suggests that material properties can be controlled through more sophisticated regulation of  
257 EET.

## 258 **Transcriptional Regulation of Extracellular Electron Transfer Yields Tunable Crosslinking** 259 **Activity**

260 For ELMs to emulate the adaptability of biological materials, the actuating components  
261 should continually sense and respond to their environment. Environmental stimuli should then  
262 induce a transcriptional response and impart control over material properties. Toward this goal,  
263 we constructed an inducible *mtrC* expression plasmid using the same genetic circuit outlined  
264 before, but replacing *sfGFP* with *mtrC* (Fig. S16-17). We transformed the  $\Delta mtrC\Delta omcA\Delta mtrF$  strain  
265 with this plasmid, such that IPTG would sequentially activate *mtrC* expression, electron transfer,  
266 and crosslinking activity. Upstream of the *mtrC* gene, a computationally-predicted weak synthetic



267 ribosome binding site was employed to optimize control over EET and minimize leaky  
268 expression(42). SDS-PAGE and heme staining of total protein from induced and uninduced cell  
269 lysates validated inducible MtrC protein production after overnight growth in IPTG-containing  
270 medium. High molecular weight bands corresponding to the size of the MtrCAB complex were  
271 observed in induced  $\Delta mtrC\Delta omcA\Delta mtrF$  samples and a wild-type control, but not in uninduced  
272 and empty vector  $\Delta mtrC\Delta omcA\Delta mtrF$  samples (Fig. S18). Functional steady-state expression of  
273 *mtrC* in response to IPTG was further validated by measuring  $Fe^{3+}$  reduction with the ferrozine  
274 assay. After 2 h of reduction,  $Fe^{2+}$  concentration increased with the presence of inducing  
275 molecule, indicating functional MtrC activity and no leaky EET response over an uninduced  
276 control (Fig. S19). Next, we verified tailored crosslinking activity in response to varying  
277 transcriptional activation. *In situ* gelation kinetics were assessed after overnight growth in media  
278 containing a range of inducing molecule concentrations. Crosslinking activity was a strong  
279 function of IPTG concentration, spanning orders of magnitude in storage modulus (Fig. 4b).  
280 Crosslinking kinetics also corresponded to inducer presence, indicating that both synthesis rate  
281 and final material modulus can be customized through differential steady-state gene expression.  
282 Both an induced empty vector control and a complemented strain with no IPTG did not form  
283 measurable gels in 2 h. Thus, transcriptional regulation over EET gene expression in response to  
284 an environmental signal imparts programmable control over hydrogel stiffness.

### 285 **Modeling Gene Expression Enables Predictable Material Properties**

286 Due to successful transcriptional regulation of *mtrC*, we hypothesized that a material  
287 property such as storage modulus could be predicted from inducible gene expression models.  
288 Since the *sfgfp* and *mtrC* circuits have identical transcriptional regulation, we tested whether both  
289 fit to activating Hill function models. First, we measured the response function of the *sfgfp* circuit  
290 in *S. oneidensis* MR-1 by inducing overnight cultures in a variety of IPTG concentrations. Steady-  
291 state fluorescence was quantified using a plate reader, and normalized to optical density (Fig.  
292 4c). As expected, relative expression (i.e., normalized fluorescence) was a strong function of  
293 IPTG concentration, and fit well to a Hill function with a hillslope of  $n = 1.57$  and a half-maximal  
294 effective concentration of  $EC_{50} = 98.6 \mu M$  (Table S5). These results indicate that our circuit  
295 generates a predictable transcriptional response. Next, end-point gel measurements were used  
296 to examine storage modulus as a function of steady-state cytochrome (MtrC) expression. Gels  
297 were crosslinked for 2 h since our *in situ* results indicated this time would provide sufficient  
298 differentiation between induced cultures at varying IPTG concentrations. Specifically,  
299  $\Delta mtrC\Delta omcA\Delta mtrF$  complemented with LacI-regulated *mtrC* was grown overnight in a variety of  
300 IPTG concentrations and allowed to react for 2 h at standard gelation conditions. We found that

301 hydrogel storage moduli were also under strong transcriptional control, similar to *sfgfp*, and could  
302 be modeled using a Hill function with  $n = 1.40$  and  $EC_{50} = 96.4 \mu\text{M}$  (Fig. 4d). As the sfGFP signal  
303 is effectively a measure of the transcriptional rate at different IPTG concentrations(43), the  
304 similarity between fitted constants for *sfgfp* expression and hydrogel stiffness suggests a model  
305 where transcriptionally-controlled MtrC levels predictably control hydrogel properties. To further  
306 visualize this relationship, we plotted normalized storage modulus as a function of relative  
307 expression units for each corresponding IPTG concentration and observed a linear correlation  
308 (Fig. 4e). The 1:1 relationship between steady-state gene expression and hydrogel properties is  
309 corroborated by the approximate unity of the slope. Together, these results demonstrate that EET  
310 gene expression can be modulated to control ELM properties (e.g., gel stiffness), and that  
311 fluorescence-parameterized models for existing and new genetic circuits may be adapted to  
312 design, predict, and control more complex macroscopic material outputs.

### 313 **Discussion:**

314 We showed that *S. oneidensis* can genetically control radical crosslinking in a semi-  
315 synthetic hydrogel via electron transfer to a redox-active polymerization catalyst. Similar to other  
316 crosslinking chemistries, storage modulus was dependent on catalyst and initiator concentrations  
317 as well as initial cell density. A significant advantage of our system is that it is theoretically  
318 amenable to any substrate that can undergo radical crosslinking and support microbial life. We  
319 used methacrylate-functionalized hyaluronic acid, but other semi-synthetic materials based on  
320 functionalized alginate, collagen, and cellulose, as well as completely synthetic substrates, such  
321 as PEG, should show similar behavior. In addition to flexibility in macromer structure, our design  
322 also allows for a variety of well-defined ATRP initiators to be used as crosslinking agents. For  
323 example, we showed two traditional ATRP initiators, HEBIB and bis-brominated PEG, could both  
324 form crosslinked hyaluronic acid hydrogels. Similar to other radical crosslinking methodologies,  
325 bacteria-controlled crosslinking is also compatible with various biochemical modifications  
326 including the installation of integrin recognition motifs (e.g., RGD), orthogonal crosslinking  
327 chemistries (e.g., Michael addition), and other common polymer engineering paradigms. The  
328 chemical flexibility and general compatibility with a variety of polymer network scaffolds should  
329 facilitate the use of our platform in tissue engineering, 3D printing, soft robotics, and drug delivery.

330 In contrast to other biologically-driven radical crosslinking methods, most notably hydroxyl  
331 radicals generated from glucose oxidase, EET-controlled crosslinking did not negatively impact  
332 cell health. Cells remained viable at least one week following gelation and transformed cells could  
333 express *sfgfp* in response to an external stimulus. We also observed genotypic changes in cell  
334 motility and convective flow as a result of EET-dependent crosslinking, implying genetic control

335 over gel microstructure. Overall, our design avoids cell viability concerns associated with other  
336 radical crosslinking methodologies and could enable synthetic platforms for studying biofilm  
337 formation(44), trapping(45), or functionalizing cells(46).

338 We found that crosslinking activity and overall hydrogel stiffness were governed by EET  
339 cytochrome expression. Specifically, *S. oneidensis* MR-1 with wild-type EET pathways generated  
340 stiff gels within an hour while negative controls containing *E. coli* MG1655, which lacks EET  
341 machinery, did not form gels on comparable timescales. At longer time scales (ca. 3-4 hours),  
342 EET-knockout strains and *E. coli* showed some crosslinking activity. This background radical  
343 generation could be caused by non-specific copper reduction (e.g., release or secretion of  
344 cytosolic reducing agents) or spurious radical activation. To further reduce background  
345 crosslinking, decreasing catalyst and/or initiator concentration, lowering cell density, or changing  
346 the identity of chemical components could all potentially be tuned. Overall, the strong link between  
347 *S. oneidensis* genetics and crosslinking rate and density lays the foundation for developing more  
348 sophisticated EET-based regulation of material properties.

349 Using *in situ* and end-point rheology measurements, we showed that hydrogel crosslinking  
350 is directly linked to *mtrC* expression levels, which has a number of implications for adaptable and  
351 dynamic materials. Interestingly, placing *mtrC* under the control of the LacI repressor generated  
352 a hydrogel stiffness response function that is characteristic of inducible gene expression. This  
353 response function mirrored one generated from *sfgfp* expression in the same construct, indicating  
354 robust transcriptional control over both gene expression and material properties. More  
355 importantly, our results suggest that previously characterized genetic circuits, including genetic  
356 logic gates, designed to express fluorescent reporters could be readily adapted to control *mtrC*  
357 expression and gel stiffness(47). Although the ultimate stiffness of the hydrogel will depend on  
358 the specific crosslinking chemistry, our observation of canonical Hill function responses  
359 demonstrates that changes in hydrogel stiffness governed by transcriptional regulation can be  
360 partially predicted. Overall, our results suggest that a variety of transcriptional circuits could be  
361 extended to control the macroscopic properties of synthetic materials in a predictable and  
362 programmable manner. Additionally, robust genetic control over crosslinking should complement  
363 other stimuli-responsive hydrogel designs, including integration of biochemical signals(48-50),  
364 actuators(51, 52), and complex geometric designs(53).

365 The gel stiffness response function was measured after 2 h of gelation since *in situ*  
366 measurements indicated this would be sufficient time to distinguish between differentially induced  
367 cells. Because crosslinking is a dynamic process, the hydrogel response function also varies as  
368 a function of time, even at steady-state expression levels of MtrC. For example, at early times (<

369 1 h), it is exaggerated since measurable gels do not form at low induction levels (Fig. S20). At  
370 longer timescales, the response function begins to collapse as background polymerization starts  
371 to compete with EET-driven crosslinking. In addition to understanding how EET influences  
372 crosslinking dynamics, many applications leveraging genetic control over material properties will  
373 likely require real-time transcriptional responses. Understanding how cells optimize transient  
374 gene expression to control dynamic outputs such as cell motility, morphogenesis, biofilm  
375 structure, or extracellular matrix construction are ongoing challenges in developmental and  
376 systems biology(54). Similarly, we are currently investigating how to coordinate transient gene  
377 expression to the polymerization kinetics in our system(55). Overall, continued optimization of  
378 MtrC (or other EET protein) expression and material chemistry should allow for actuation of  
379 material changes over timescales similar to transcription and translation, as well as predictive  
380 models that relate gene expression to material function.

381 Overall, we found that extracellular electron transfer from *S. oneidensis* could power a  
382 radical polymerization catalyst and form a semi-synthetic hydrogel composed of functionalized  
383 hyaluronic acid. A variety of chemical and biological factors controlled crosslinking kinetics and  
384 the resulting storage moduli of the gels, demonstrating a tunable and adaptable platform. Most  
385 importantly, we found that robust transcriptional control over *mtrC* expression and metabolic  
386 electron flux enabled precise and predictable control over hydrogel mechanical properties. While  
387 cells are frequently incorporated into polymer networks, our platform allows for a variety of  
388 network properties including crosslink density, mesh size, degradation, diffusion, and elastic  
389 modulus to be controlled through cellular metabolism and gene expression. In summary, our  
390 results provide a powerful foundation to program adaptive and responsive behavior into the vast  
391 functional space of synthetic materials through the conduit of biological electron transfer.

392  
393 **Acknowledgements:** *S. oneidensis* knockouts were a generous gift from Prof. Jeffrey Gralnick  
394 (U. Minnesota). A.J.G. was supported through a National Science Foundation Graduate Research  
395 Fellowship (Program Award No. DGE-1610403). This research was supported by the Welch  
396 Foundation (Grants F-1929), and by the National Science Foundation through the Center for  
397 Dynamics and Control of Materials: an NSF Materials Research Science and Engineering Center  
398 under DMR- 1720595. The authors acknowledge use of shared research facilities supported in  
399 part by the Texas Materials Institute, the Center for Dynamics and Control of Materials: an NSF  
400 MRSEC (DMR-1720595), and the NSF National Nanotechnology Coordinated Infrastructure  
401 (ECCS-1542159). A.M.R. gratefully acknowledges a Career Award at the Scientific Interface

402 (#1015895) from the Burroughs Wellcome Fund. We gratefully acknowledge the use of facilities  
403 within the core microscopy lab of the Institute for Cellular and Molecular Biology, University of  
404 Texas at Austin. NMR spectra were collected on a Bruker Avance III 500 funded by the NIH  
405 (Award 1 S10 OD021508-01) and a Bruker Avance III HD 400 funded by the NSF (Award CHE  
406 1626211).

407

408 **Correspondence:** Correspondence should be addressed to keitz@utexas.edu and  
409 arosales@che.utexas.edu.

410

411 **Author Contributions:** A.J.G., A.M.R., and B.K.K. conceived the project; A.J.G., C.M.D., and  
412 D.S.K. performed experiments; C.M.D. designed and built the *sfgfp* and *mtrC* expression  
413 plasmids; A.H. assisted with MeHA synthesis and rheology; A.J.G., C.M.D., A.M.R., and B.K.K.  
414 analyzed the results; A.J.G., C.M.D., A.M.R., and B.K.K. wrote the manuscript.

415

416 **ORCID:**

417 Austin J. Graham: 0000-0001-8924-181X

418 Christopher M. Dundas: 0000-0001-9183-8236

419 Adrienne M. Rosales: 0000-0003-0207-7661

420 Benjamin K. Keitz: 0000-0003-3314-0053

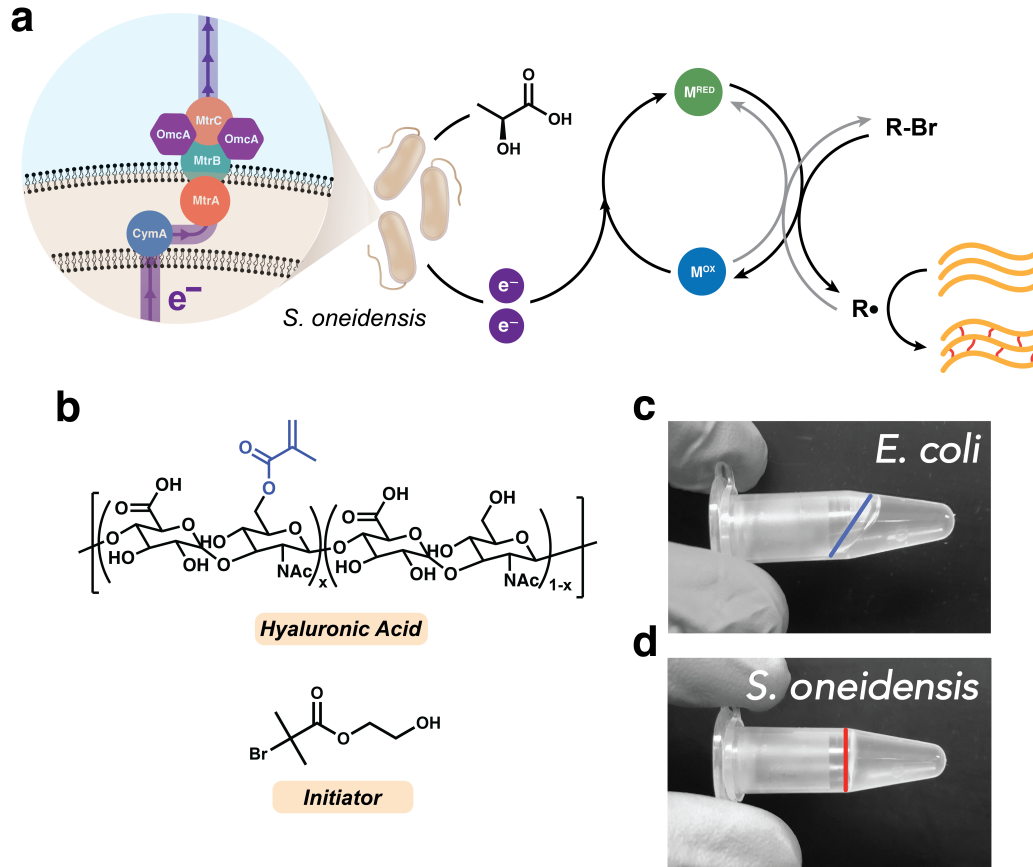

**Figure 1.** Extracellular electron transfer from *S. oneidensis* controls radical crosslinking of a semi-synthetic hydrogel. (a) The Mtr pathway of *S. oneidensis* transfers metabolic electron flux to a metal catalyst, which generates a radical from a brominated initiator and crosslinks acrylate-based functional groups. (b) Chemical structures of the macromer, methacrylated hyaluronic acid (MeHA), and the radical initiator, 2-hydroxyethyl 2-bromoisobutyrate (HEBIB). (c) Crosslinking reaction mixture inoculated with *E. coli*, which does not possess EET machinery, does not form gels as indicated by liquid flow. Air-liquid interface is highlighted. (d) Crosslinking reaction mixture inoculated with *S. oneidensis* MR-1 forms a solid gel as confirmed by inversion test. Air-liquid interface is highlighted.



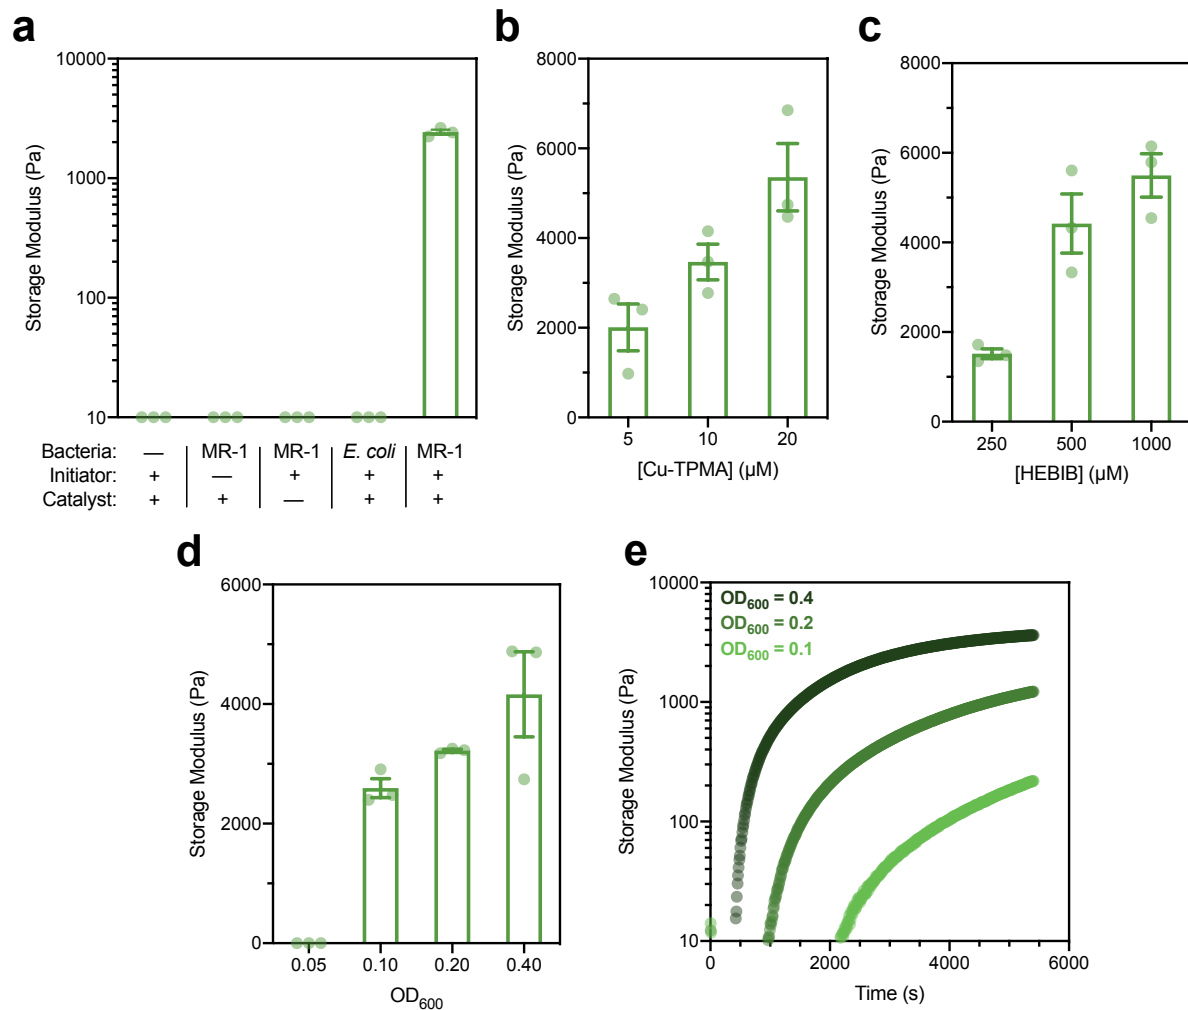

**Figure 2.** Living hydrogel materials crosslinked by *S. oneidensis* MR-1 can be chemically or biologically tuned. (a) Storage moduli of hydrogels crosslinked with various components missing measured by rheology after 2 hours of crosslinking. Many gels did not form and could not be characterized. (b) Storage moduli of hydrogels crosslinked for 2 hours with various concentrations of Cu-TPMA (catalyst), one-way ANOVA  $p = 0.018$ . (c) Storage moduli of hydrogels crosslinked for 2 hours with various concentrations of HEBIB (radical initiator), one-way ANOVA  $p = 0.0027$ . (d) End-point storage moduli at 2 hours and (e) *in situ* rheology of hydrogels crosslinked with various inoculating densities of *S. oneidensis* MR-1 and therefore varying degrees of electron transfer, one-way ANOVA  $p = 0.0002$ . Gels did not form using  $\text{OD}_{600} = 0.05$  in either experiment. (a-d) Data are shown as mean  $\pm$  SEM,  $n = 3$  biological replicates.

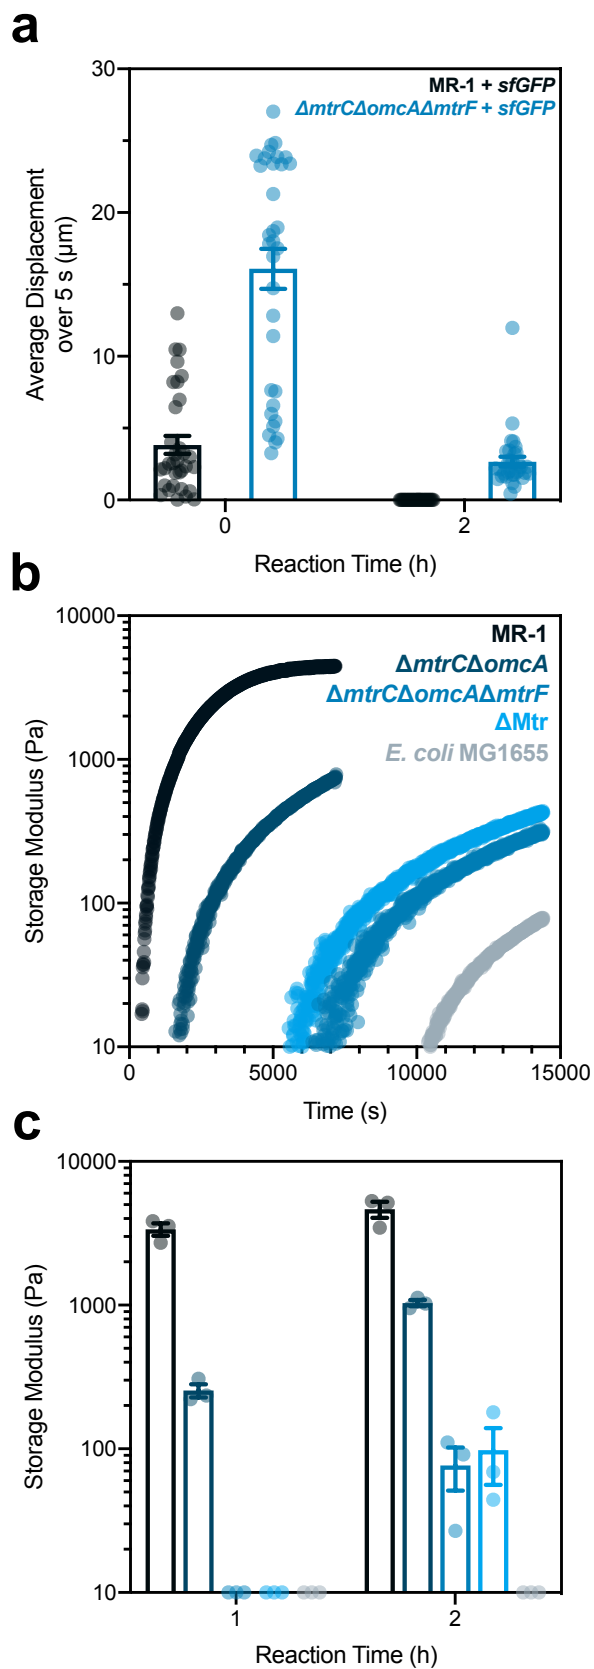

**Figure 3.** Crosslink density, synthesis rate, and cell motility within living hydrogels are governed by *S. oneidensis* genetics and EET machinery. (a) Average cell displacement within the gels measured by microscopy over 5 second time-lapses at both 0 and 2 hours into crosslinking. Displacement was quantified using TrackMate in Fiji 1.0. Student t-test  $p < 0.0001$  between strains at  $t = 0$  and 2 hours. (b) *In situ* and (c) end-point rheology measurements of hydrogels crosslinked by *S. oneidensis* strains with various EET genes knocked out. *E. coli* was included as an EET-deficient control. Student t-test  $p < 0.0001$  for MR-1 compared to other strains at  $t = 1$  and 2 hours. Data are shown as mean  $\pm$  SEM, (a)  $n = 33$  tracked cells or (c)  $n = 3$  biological replicates.

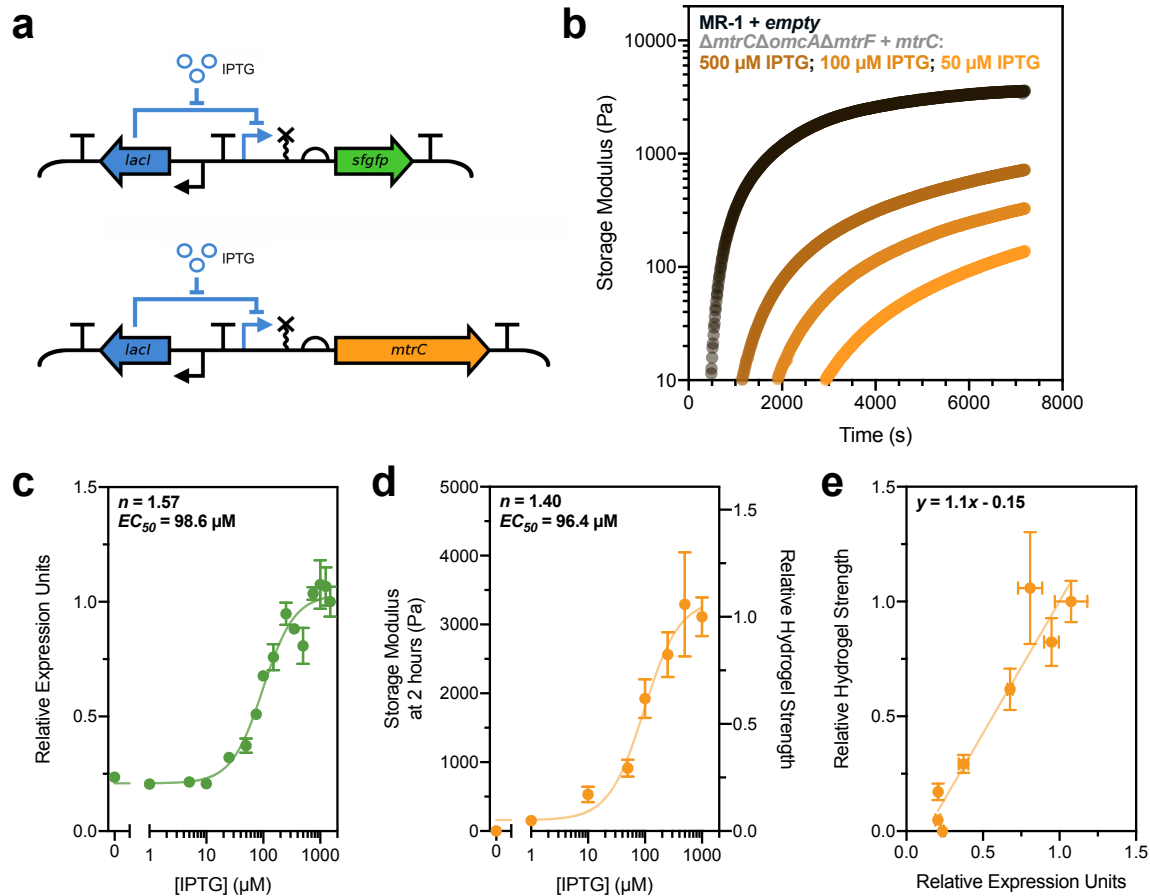

**Figure 4.** Modeling gene expression allows quantitative prediction of living hydrogel properties. (a) Genetic circuits utilized in this study placed either *sfgfp* or *mtrC* under inducible control of IPTG via the LacI repressor and  $P_{tac}$  promoter. (b) *In situ* rheology of hydrogels crosslinked by *S. oneidensis* with steady-state induced *mtrC* levels at various IPTG concentrations.  $\Delta mtrC\Delta omcA\Delta mtrF$  + empty and  $\Delta mtrC\Delta omcA\Delta mtrF$  + *mtrC* with 0  $\mu\text{M}$  IPTG were also tested, but did not form gels on the time scale shown. (c) Hill function analysis of sfGFP fluorescence (denoted as relative expression units by normalization to fluorescence at maximum induction) as a function of IPTG concentration. (d) Hill function analysis of hydrogel storage modulus after 2 hours of crosslinking as a function of IPTG concentration. Right y-axis is storage modulus normalized to average modulus at maximum induction. (e) Normalized hydrogel stiffness plotted as a function of relative expression units for corresponding IPTG concentrations, fit to a line ( $R^2 = 0.80$ ). (c-e) Data are shown as mean  $\pm$  SEM,  $n = 3$  biological replicates.

## Materials and Methods:

### Chemicals and Reagents

Sodium hyaluronate (72 kDa, Lifecore Biomedical), methacrylic anhydride (Sigma-Aldrich, 94%), copper(II) bromide ( $\text{CuBr}_2$ , Sigma-Aldrich, 99%), tris(2-pyridylmethyl)amine (TPMA, Sigma-Aldrich, 98%), 2-hydroxyethyl 2-bromoisobutyrate (HEBIB, Sigma-Aldrich, 95%), poly(ethylene glycol) bis(2-bromoisobutyrate) (PEGBBIB,  $M_{n,avg} = 700$  g/mol, Sigma-Aldrich,  $PDI \leq 1.1$ ) sodium DL-lactate ( $\text{NaC}_3\text{H}_5\text{O}_3$ , TCI, 60% in water), sodium fumarate ( $\text{Na}_2\text{C}_4\text{H}_2\text{O}_4$ , VWR, 98%), HEPES buffer solution ( $\text{C}_8\text{H}_{18}\text{N}_2\text{O}_4\text{S}$ , VWR, 1 M in water,  $\text{pH} = 7.3$ ), potassium phosphate dibasic ( $\text{K}_2\text{HPO}_4$ , Sigma-Aldrich), potassium phosphate monobasic ( $\text{KH}_2\text{PO}_4$ , Sigma-Aldrich), sodium chloride ( $\text{NaCl}$ , VWR), ammonium sulfate ( $(\text{NH}_4)_2\text{SO}_4$ , Fisher Scientific), magnesium (II) sulfate heptahydrate ( $\text{MgSO}_4 \cdot 7\text{H}_2\text{O}$ , VWR), trace mineral supplement (ATCC), casamino acids (VWR), silicone oil (Alfa Aesar), isopropyl  $\beta$ -D-1-thiogalactopyranoside (IPTG, Teknova), kanamycin sulfate ( $\text{C}_{18}\text{H}_{38}\text{N}_4\text{O}_{15}\text{S}$ , Growcells), nail polish (Electron Microscopy Sciences), BacLight Live/Dead Stain (Invitrogen), deuterium oxide ( $\text{D}_2\text{O}$ , Sigma-Aldrich, 99.9%), hydrogen peroxide solution ( $\text{H}_2\text{O}_2$ , Sigma-Aldrich, 30% in  $\text{H}_2\text{O}$ ), and 3,3',5,5'-Tetramethylbenzidine (TMBZ, Alfa Aesar, 98%) were used as received. All media components were autoclaved or sterilized using 0.2  $\mu\text{m}$  PES filters.

### Methacrylated Hyaluronic Acid Synthesis and Purification

MeHA was functionalized using methacrylic anhydride according to an established protocol(29). Briefly, ~72 kDa HA macromer (1.5 g, 3.81 mmol, 1.0 eq) was dissolved at 1 wt.% in DI water (150 mL), cooled on ice, and adjusted to  $\text{pH} = 8.5$  using 5 N NaOH. The pH was maintained between 7.5 – 8.5 using NaOH while methacrylic anhydride (8.44 mL, 56.7 mmol, 14.9 eq) was added in 750  $\mu\text{L}$  aliquots every ~5 minutes. Once all the methacrylic anhydride was added, the pH was maintained between 7.5 – 8.5 for 4 hours, then the reaction stoppered and stirred overnight at room temperature. The reaction solution was dialyzed using 6 – 8 kDa dialysis tubing in DI water while stirring for two weeks. The mixture was then frozen and lyophilized. Methacrylate functionalization was quantified by  $^1\text{H-NMR}$  spectroscopy and determined to be ~65% from integration of the vinyl group relative to the HA backbone (Fig. S1). Functionalized MeHA solution was passed through an alumina column immediately prior to crosslinking reactions.

### Bacteria Strains and Culture

Bacterial strains and plasmids are listed in Table S1 Cultures were prepared as follows: bacterial stocks stored in 20% glycerol at  $-80$  °C were streaked onto LB agar plates (for wild-type and knockout strains) or LB agar with 25  $\mu\text{g}/\text{mL}$  kanamycin (for plasmid-harboring strains) and grown overnight at 30 °C for *Shewanella*, 37 °C for *E. coli*. Single colonies were isolated and inoculated into *Shewanella* Basal Medium (SBM) supplemented with 100 mM HEPES, 0.5% trace mineral supplement, 0.5% casamino acids, and 20 mM 60% sodium lactate (2.85  $\mu\text{L}/\text{mL}$ ) as the electron donor. Aerobic cultures were pregrown in plastic 15 mL culture tubes at 30 °C and 250 rpm shaking. Anaerobic cultures were pregrown using the same procedure outlined above, but in degassed medium in a humidified anaerobic chamber and supplemented with 40 mM sodium fumarate (40  $\mu\text{L}/\text{mL}$  of a 1 M stock) as the electron acceptor. Cultures were washed after pregrowth using SBM supplemented with 0.5% casamino acids (degassed for anaerobic cultures).  $\text{OD}_{600}$  was measured using a NanoDrop 2000C spectrophotometer and normalized to 2.0 for 10-fold dilution into gel mixtures unless otherwise noted.

### MeHA Hydrogel Crosslinking using *S. oneidensis*

$\text{CuBr}_2$ , TPMA, and HEBIB stock solutions were prepared according to previously established protocol(21). For three 50  $\mu\text{L}$  hydrogel discs that were analyzed by rheology, a

reaction mixture was prepared as follows: MeHA was dissolved at 3.76 wt.% in SBM with 0.5% casamino acids and aliquoted into an autoclaved microfuge tube (119.2  $\mu$ L). 400  $\mu$ M Cu-TPMA (3.75  $\mu$ L), 69 mM HEBIB (1.09  $\mu$ L), 60% sodium lactate (0.428  $\mu$ L), and 1 M sodium fumarate (6  $\mu$ L) were added to the MeHA solution and mixed. Final concentrations in solution were 3 wt.% MeHA, 10  $\mu$ M Cu-TPMA, 500  $\mu$ M HEBIB, 20 mM lactate, and 40 mM fumarate. This solution was distributed into three autoclaved microfuge tubes of 45  $\mu$ L aliquots to which 5  $\mu$ L of OD<sub>600</sub> normalized cells were added. The gel solutions were mixed and added to hydrophobically-treated glass slides with a 0.5 mm silicone spacer separating the two glass layers. Slides were sealed with a binder clip and allowed to react at 30 °C for two hours unless otherwise noted. Hydrogels were removed from the slides using a razor blade and placed into 3 mL baths of 1x PBS overnight to swell to equilibrium. Hydrogels analyzed by *in situ* rheology were prepared using the same mixture outlined above, but inoculated with cells and immediately placed on the rheometer for analysis.

### Rheological Analysis

End-point rheological analysis: swollen hydrogels prepared as outlined above were analyzed by oscillatory shear rheology using a TA Instruments Discovery HR-2 Rheometer with an 8 mm parallel plate geometry. Hydrogels were loaded onto a Peltier plate and excised to 8 mm diameter using a biopsy punch. The geometry gap was then lowered until the measured axial force was above 0.02 N (usually between 500 – 800  $\mu$ m, depending on the crosslink density and swelling ratio). Storage and loss moduli were measured using frequency sweeps from 0.01 to 100 Hz at a constant strain of 0.1%. Moduli for a single gel were quantified by averaging the linear viscoelastic region of each frequency sweep.

*In situ* rheological analysis: hydrogels measured by *in situ* oscillatory shear rheology were prepared using the mixtures and rheometer outlined above. Immediately after inoculating reaction mixtures with cells, 80  $\mu$ L of mix was loaded onto the Peltier plate, which was maintained at 30 °C. A 20 mm parallel plate geometry was lowered onto the solution while spinning such that the mixture coated the entire geometry surface and filled the gap (~350  $\mu$ m gap size). The edges of the geometry and gap were then coated with silicone oil to prevent evaporative losses. *In situ* crosslinking was monitored using 1 Hz oscillation and 0.1% strain over variable lengths of time (1.5 – 8 hours).

### Microscopy and Cell Tracking

All microscopy was performed using a Nikon Ti2 Eclipse inverted fluorescence microscope. Cells assessed for viability by microscopy were crosslinked using standard conditions and the resulting gels swollen in 1x PBS at room temperature for varying lengths of time. The gels were then incubated in the dark in the BacLight Live/Dead stain mix (1.5  $\mu$ L/mL Syto9, 2.5  $\mu$ L/mL propidium iodide in 0.85% NaCl solution) for 30 minutes. Stained gels were then washed by pipetting 3x in 1 mL PBS to remove unbound dye. Gels were loaded onto glass microscope slides and a no. 1 coverslip placed on top. The gel thickness prevented using nail polish to seal the sides, but evaporative losses were not noticeable over the course of the experiment. Fluorescence for each stain (green for Syto9, red for propidium iodide) was measured using GFP and Texas Red excitation/emission filter cubes on a Nikon Ti2 Eclipse, as outlined previously(21). To assess metabolic activity, gels were crosslinked with *sfgfp*-harboring strains and allowed to swell in 1x PBS for varying lengths of time. sfGFP fluorescence was assessed before induction to ensure there was no detectable background fluorescence. Gels were then incubated in 1000  $\mu$ M IPTG in PBS for 24 hours and monitored by fluorescence using the GFP channel.

Cells tracked by microscopy during crosslinking were prepared with reaction mixtures as outlined above. Upon cell inoculation, the crosslinking mixture was loaded onto glass slides, covered, and sealed with nail polish. The slides were loaded onto the microscope and cell

movement monitored using the Time-lapse function in NIS-Elements. Images were taken every 1 s or 5 s with 100 or 300 ms exposure time using the GFP channel. Time-lapse images were edited and quantified using TrackMate in Fiji 1.0. Images were first background subtracted and equally brightened by thresholding. The top 50 highest quality cells were selected, as determined by the TrackMate user interface, and tracked over 5 or 10 s. The highest quality tracks, as determined by the software, were used to quantify average total displacement over the time-lapse. The number of tracks used to calculate the average was the maximum number of tracks for the image with the fewest tracks at each time point.

### Plasmid Construction

DNA sequences and plasmid maps for each genetic part and plasmid used in this study are given in the Supplementary Information. All plasmids were assembled via Golden Gate cloning using enzymes and buffers from New England Biolabs. In addition to T4 Ligase, Golden Gate reactions contained either SapI for *mtrC* plasmid assembly or BsaI for *sfgfp* and empty plasmid assembly. The pCD backbone was assembled by PCR amplifying (Phusion, New England Biolabs) regions of pSR58.6 (B0015 and T0 terminators, ColE1 origin of replication), pTKEI-tLOV (kanamycin resistance), and pAL-rfp\_(RP4 origin of transfer). To construct the gene expression unit (insulating terminators, RiboJ ribozyme, and *lacI* regulation unit), a gBlock was synthesized (Integrated DNA Technologies) and used in Golden Gate cloning. *sfgfp* and *mtrC* were PCR amplified from pSR58.6 and purified *Shewanella oneidensis* MR-1 genomic DNA, respectively, with ribosome binding sites and Golden Gate restriction enzyme sites added via oligonucleotide primers. Generally, 10  $\mu$ L Golden Gate reactions were set up that contained 10 fmol of pCD plasmid backbone and 40 fmol of each gBlock and/or PCR insert (as necessary). In a thermocycler, Golden Gate reactions were cycled 25 times: 90 s at 37 °C followed by 3 minutes at 16 °C. After the 25 cycles, reactions were incubated at 37 °C for 5 minutes, 80 °C for 10 minutes, and then held at 4 °C.

Golden Gate reactions were used to directly transform freshly prepared electrocompetent *S. oneidensis* strains(56). To prepare electrocompetent *S. oneidensis*, 5 mL of overnight *S. oneidensis* growth in LB medium at 30 °C was washed 3 times with sterile 10% glycerol at room temperature and concentrated to ~300  $\mu$ L. 2  $\mu$ L of Golden Gate reaction was mixed with 30  $\mu$ L of concentrated electrocompetent *S. oneidensis*, transferred to a 1 mm electroporation cuvette, and electroporated at 1250 V. To recover electroporated cells, 250  $\mu$ L of LB was immediately added post-electroporation and cells were incubated/shaken at 30 °C and 250 rpm. After 2 h of recovery, 100  $\mu$ L of cell suspension was plated onto LB agar plates containing 25  $\mu$ g mL<sup>-1</sup> kanamycin sulfate and incubated overnight at 30 °C to obtain single colonies (generally 5-100 colonies observed for 1-3 part assemblies). Single colonies were used to inoculate LB liquid medium containing 25  $\mu$ g mL<sup>-1</sup> kanamycin sulfate and incubated/shaken overnight at 30 °C and 250 rpm. These cultures were used to generate 22.5% glycerol stocks, which were stored at -80 °C, and harvest assembled plasmid for Sanger sequencing (DNA Sequencing Facilities, University of Texas at Austin).

### Verification of MtrC Inducible Expression and Functional Activity

Heme staining was performed by adapting previously described methods (57). 5 mL of uninduced (0  $\mu$ M IPTG) and induced (1000  $\mu$ M IPTG) *S. oneidensis* strains were anaerobically cultured overnight in SBM containing 20 mM lactate and 40 mM fumarate. The total culture was washed once in 1x PBS, concentrated to 500  $\mu$ L, and lysed by sonication. The cell lysate was centrifuged for 10 minutes at 10,000 rcf, and the supernatant was transferred to a separate tube. The pellet was resuspended in 100  $\mu$ L 1x PBS, and the total protein concentration of both lysate fractions was determined by Bradford assay. 10  $\mu$ g of protein from the supernatant and pellet were loaded into each well of a 12% Bis-Tris SDS-PAGE gel and run for ca. 120 minutes at 110 V. The gel was stained in a 3:7 mixture of 6.3 mM TMBZ in methanol:0.25 M sodium acetate (pH



5.0) for 2 h in the dark. Heme-containing protein bands were visualized upon addition of 30 mM hydrogen peroxide for 30 min.

Ferrozine assay(58) was performed to determine functional activity of MtrC-expressing strains. Strains were anaerobically grown overnight in IPTG-free SBM containing 20 mM lactate and 40 mM fumarate. Within in anaerobic chamber, cells were diluted 100-fold into 96-well plate wells filled SBM containing 20 mM lactate, 5 mM Fe(III)-citrate, and 1 mg mL<sup>-1</sup> ferrozine (final total volume of 250 µL per well). Each well contained either 0 or 750 µM IPTG and Fe(II) standards were also added to the plate. Immediately after addition of cells and Fe(III), the plate was sealed with optically transparent sealing film and a plate cover lined with silicone grease. The plate was then removed from the anaerobic chamber and statically incubated at 30 °C. Absorbance at 562 nm was periodically measured using a BMG LABTECH CLARIOstar plate reader.

### Quantification and Modeling of Inducible Constructs

The  $\Delta mtrC\Delta omcA\Delta mtrF + sfgfp$  and  $+ mtrC$  strains were anaerobically pregrown overnight using the same conditions outlined above, with the addition of 25 µg mL<sup>-1</sup> kanamycin and varying IPTG concentrations. Cells were anaerobically washed 3x in degassed SBM with 0.05% casamino acids, normalized to OD<sub>600</sub> = 2.0, and diluted 10-fold into reaction mixtures (also containing kanamycin and IPTG) prepared in ambient conditions. Prior to measuring sfGFP fluorescence, protein translation was arrested by supplementing a 100 µL aliquot of cell suspension with kanamycin sulfate to a final concentration of 2 mg mL<sup>-1</sup>. Subsequently, this suspension was shaken aerobically for 1 h at 30 °C to allow for sfGFP maturation. sfGFP fluorescence (488/530 nm) and cell suspension absorbance (600 nm) was measured using a BMG LABTECH CLARIOstar plate reader to yield fluorescence absorbance<sup>-1</sup> for each sample. For each sample, the background fluorescence absorbance<sup>-1</sup> from an empty vector (pCD8) control was subtracted. The background subtracted values were then normalized to the average fluorescence absorbance<sup>-1</sup> value at maximum induction (1500 µM IPTG) to give relative expression units. Crosslinking strains complemented with *mtrC* were allowed to form gels for two hours, and the gels allowed to swell overnight in 1x PBS at room temperature. Gels were then analyzed by oscillatory shear rheology as outlined above. A nonlinear fitting algorithm in GraphPad Prism 8.0 was used to fit inducible gene expression and hydrogel storage modulus to the following activating Hill function:  $y = Bottom + (Top - Bottom) \frac{[I]^n}{EC_{50}^n + [I]^n}$ . Normalized hydrogel storage modulus and relative expression units were plotted for values at corresponding IPTG concentrations and modeled using a linear fit. Further details on modeling can be found in Note S1. Fitting parameters and “goodness of fit” can be found in Table S5.

### Statistical Analysis

Unless otherwise noted, data are reported as mean ± SEM of  $n = 3$  biological replicates. Significance was calculated in GraphPad Prism 8.0 using either a two-tailed unpaired student t-test or a one-way ANOVA ( $\alpha = 0.05$ ).

### Data deposition

Experimental data supporting the findings in this study are publicly available through the Texas Data Repository (doi: XXX).

### References:

1. Huebsch N, Mooney DJ (2009) Inspiration and application in the evolution of biomaterials. *Nature* 462: 426-432.

2. Chen AY, Zhong C, Lu TK (2014) Engineering Living Functional Materials. *ACS Synthetic Biology* 4(1):8–11.
3. Gilbert C, Ellis T (2019) Biological Engineered Living Materials: Growing Functional Materials with Genetically Programmable Properties. *ACS Synthetic Biology* 8(1):1–15.
4. Nguyen PQ, Courchesne N-MD, Duraj-Thatte A, Praveschotinunt P, Joshi NS (2018) Engineered Living Materials: Prospects and Challenges for Using Biological Systems to Direct the Assembly of Smart Materials. *Adv Mater* 30(19):1704847–34.
5. Chen AY, et al. (2014) Synthesis and patterning of tunable multiscale materials with engineered cells. *Nature Materials* 13(5):515–523.
6. Appiah C, et al. (2019) Living Materials Herald a New Era in Soft Robotics. *Adv Mater* 9:1807747–28.
7. Shaffner M, Rühs PA, Coulter F, Kilcher S, Studart AR (2017) 3D printing of bacteria into functional complex materials. *Sci Adv* 3(12):eaao6804.
8. Liu X, et al. (2017) 3D Printing of Living Responsive Materials and Devices. *Adv Mater* 34:1704821–14.
9. Liu X, et al. (2017) Stretchable living materials and devices with hydrogel-elastomer hybrids hosting programmed cells. *Proc Natl Acad Sci USA* 114(9):2200–2205.
10. Mangayil R, et al. (2017) Engineering and Characterization of Bacterial Nanocellulose Films as Low Cost and Flexible Sensor Material. *ACS Applied Materials & Interfaces* 9(22):19048–19056.
11. Nguyen PQ, Botyanszki Z, Tay PKR, Joshi NS (2014) Programmable biofilm-based materials from engineered curli nanofibres. *Nature Communications* 5:4945.
12. Kalyoncu E, Ahan RE, Ozcelik CE, Seker UOS (2019) Genetic Logic Gates Enable Patterning of Amyloid Nanofibers. *Adv Mater*:1902888–7.
13. Huang J, et al. (2018) Programmable and printable *Bacillus subtilis* biofilms as engineered living materials. *Nat Chem Biol* 15:34–41.
14. Botyanszki Z, Tay PKR, Nguyen PQ, Nussbaumer MG, Joshi NS (2015) Engineered catalytic biofilms: Site-specific enzyme immobilization onto *E. coli* curli nanofibers. *Biotechnol Bioeng* 112(10):1–10.
15. Tay PKR, Nguyen PQ, Joshi NS (2017) A Synthetic Circuit for Mercury Bioremediation Using Self-Assembling Functional Amyloids. *ACS Synthetic Biology* 6(10):1841–1850.
16. Dorval Courchesne N-M, et al. (2018) Biomimetic engineering of conductive curli protein films. *Nanotechnology* 29(45):454002–13.
17. Duraj Thatte AM, et al. (2019) Genetically Programmable Self-Regenerating

- Bacterial Hydrogels. *Adv Mater* 3:1901826–9.
18. Thongsomboon W, et al. (2018) Phosphoethanolamine cellulose: A naturally produced chemically modified cellulose. *Science* 359: 334–338.
  19. Florea M, et al. (2016) Engineering control of bacterial cellulose production using a genetic toolkit and a new cellulose-producing strain. *Proc Natl Acad Sci USA* 113(24):E3431–40.
  20. McEvoy MA, Correll N (2015) Materials that couple sensing, actuation, computation, and communication. *Science* 347(6228):1261689–1261689.
  21. Fan G, Dundas CM, Graham AJ, Lynd NA, Keitz BK (2018) *Shewanella oneidensis* as a living electrode for controlled radical polymerization. *Proc Natl Acad Sci USA* 4:201800869–6.
  22. Gao H, Chan N, Oh JK, Matyjaszewski K (2015) Designing Hydrogels by ATRP. *In-Situ Gelling Polymers: for Biomedical Applications*. ed Loh XJ (Springer Singapore, Singapore), pp 69–105.
  23. Lee KY, Kong HJ, Larson RG, Mooney DJ (2003) Hydrogel Formation via Cell Crosslinking. *Adv Mater* 15(21):1828–1832.
  24. Pitzler C, et al. (2014) A Fluorescent Hydrogel-Based Flow Cytometry High-Throughput Screening Platform for Hydrolytic Enzymes. *Chemistry & Biology* 21(12):1733–1742.
  25. Isdorf NLX, et al. (2015) A flow cytometer-based whole cell screening toolbox for directed hydrolase evolution through fluorescent hydrogels. *Chemical Communications* 51:8679–8682.
  26. Nagahama K, Kimura Y, Takemoto A (2018) Living functional hydrogels generated by bioorthogonal cross-linking reactions of azide-modified cells with alkyne-modified polymers. *Nature Communications* 9:2195.
  27. Liu Y, Sakai S, Kawa S, Taya M (2014) Identification of Hydrogen Peroxide-Secreting Cells by Cytocompatible Coating with a Hydrogel Membrane. *Anal Chem* 86(23):11592–11598.
  28. Huang A, et al. (2018) BioBits™ Explorer: A modular synthetic biology education kit. *Sci Adv* 4:eaat5105.
  29. Rodell CB, et al. (2014) Shear-Thinning Supramolecular Hydrogels with Secondary Autonomous Covalent Crosslinking to Modulate Viscoelastic Properties In Vivo. *Adv Func Mater* 25(4):636–644.
  30. Xu X, Jha AK, Harrington DA, Farach-Carson MC, Jia X (2012) Hyaluronic acid-based hydrogels: from a natural polysaccharide to complex networks. *Soft Matter* 8(12):3280–15.
  31. Matyjaszewski K (2012) Atom Transfer Radical Polymerization (ATRP): Current

- Status and Future Perspectives. *Macromolecules* 45(10):4015–4039.
32. Toes ACM, Daleke MH, Kuenen JG, Muyzer G (2008) Expression of copA and cusA in *Shewanella* during copper stress. *Microbiology* 154(9):2709–2718.
  33. Böl M, Ehret AE, Bolea Albero A, Hellriegel J, Krull R (2012) Recent advances in mechanical characterisation of biofilm and their significance for material modelling. *Critical Reviews in Biotechnology* 33(2):145–171.
  34. Engler AJ, Sen S, Sweeney HL, Discher DE (2006) Matrix Elasticity Directs Stem Cell Lineage Specification. *Cell* 126(4):677–689.
  35. Carr DA, Peppas NA (2009) Molecular Structure of Physiologically-Responsive Hydrogels Controls Diffusive Behavior. *Macromol Biosci* 9(5):497–505.
  36. Bathe M, Rutledge GC, Grodzinsky AJ, Tidor B (2005) A Coarse-Grained Molecular Model for Glycosaminoglycans: Application to Chondroitin, Chondroitin Sulfate, and Hyaluronic Acid. *Biophysical Journal* 88(6):3870–3887.
  37. Paulick A, et al. (2009) Two different stator systems drive a single polar flagellum in *Shewanella oneidensis* MR-1. *Molecular Microbiology* 71(4):836–850.
  38. Tinevez J-Y, et al. (2017) TrackMate: An open and extensible platform for single-particle tracking. *Methods* 115:80–90.
  39. Coursolle D, Gralnick JA (2010) Modularity of the Mtr respiratory pathway of *Shewanella oneidensis* strain MR-1. *Molecular Microbiology* 55:995–1008.
  40. Clarke TA, et al. (2011) Structure of a bacterial cell surface decaheme electron conduit. *Proc Natl Acad Sci USA* 108:9384–9389.
  41. Coursolle D, Gralnick JA (2012) Reconstruction of Extracellular Respiratory Pathways for Iron(III) Reduction in *Shewanella Oneidensis* Strain MR-1. *Frontiers in Microbiology* 3:1–11.
  42. Farasat I, et al. (2014) Efficient search, mapping, and optimization of multi-protein genetic systems in diverse bacteria. *Mol Syst Biol* 10(6):731–18.
  43. Kelly JR, et al. (2009) Measuring the activity of BioBrick promoters using an in vivo reference standard. *Journal of Biological Engineering* 3(1):4–13.
  44. Zhang Y, Ng CK, Cohen Y, Cao B (2014) Cell growth and protein expression of *Shewanella oneidensis* in biofilms and hydrogel-entrapped cultures. *Mol BioSyst* 10(5):1035–8.
  45. Park JH, Hong D, Lee J, Choi IS (2016) Cell-in-Shell Hybrids: Chemical Nanoencapsulation of Individual Cells. *Accounts of Chemical Research* 49(5):792–800.
  46. Niu J, et al. (2017) Engineering live cell surfaces with functional polymers via cyto-compatible controlled radical polymerization. *Nature Chemistry* 9(6):537–545.

47. Brophy JAN, Voigt CA (2014) Principles of genetic circuit design. *Nature Methods* 11: 508-520.
48. Lu Y, Aimetti AA, Langer R, Gu Z (2016) Bioresponsive materials. *Nat Rev Mater* 2(1):16075–17.
49. Badeau BA, Comerford MP, Arakawa CK, Shadish JA, DeForest CA (2018) Engineered modular biomaterial logic gates for environmentally triggered therapeutic delivery. *Nature Chemistry* 10:251–258.
50. Wang H, et al. (2017) Covalently Adaptable Elastin-Like Protein-Hyaluronic Acid (ELP-HA) Hybrid Hydrogels with Secondary Thermoresponsive Crosslinking for Injectable Stem Cell Delivery. *Adv Func Mater* 27(28):1605609–11.
51. Ionov L (2014) Hydrogel-based actuators: possibilities and limitations. *Biochemical Pharmacology* 17(10):494–503.
52. de Almeida P, et al. (2019) Cytoskeletal stiffening in synthetic hydrogels. *Nature Communications* 10:609.
53. Na J-H, et al. (2014) Programming Reversibly Self-Folding Origami with Micropatterned Photo-Crosslinkable Polymer Trilayers. *Adv Mater* 27(1):79–85.
54. Yosef N, Regev A (2011) Impulse Control: Temporal Dynamics in Gene Transcription. *Cell* 144(6):886–896.
55. Ang J, Harris E, Hussey BJ, Kil R, McMillen DR (2013) Tuning Response Curves for Synthetic Biology. *ACS Synthetic Biology* 2(10):547–567.
56. Corts AD, Thomason LC, Gill RT, Gralnick JA (2019) A new recombineering system for precise genome-editing in *Shewanella oneidensis* strain MR-1 using single-stranded oligonucleotides. *Scientific Reports* 9:39.
57. Bradford MM (1976) A Rapid and Sensitive Method for the Quantitation of Microgram Quantities of Protein Utilizing the Principle of Protein-Binding Dye. *Analytical Biochemistry* 72:248-254.
58. Stookey LL (1970) Ferrozine-A New Spectrophotometric Reagent for Iron. *Analytical Chemistry* 42(7):779–781.
